# Supplementary material for: High Remnant Cholesterol Level Potentiates the Development of Hypertension
Source: PubMed Central journal article supplement (PMC8863865; doi:10.3389/fendo.2022.830347), 2022-02-09
Supplement: DataSheet_1.pdf [file DataSheet_1.pdf]

## **Supplemental Material**

### **High Remnant Cholesterol Level Potentiates the Development of Hypertension**

**Table S1** Baseline characteristic of 24252 participants in longitudinal analysis

**Table S2** Baseline characteristics of study variables in Cohort 1

**Table S3** Baseline characteristics of study variables in Cohort 2

**Table S4** Baseline hypertension was associated with subsequent HRC in Cohort 2

**Table S5** Cross-lagged standard regression coefficient of RC and blood pressure levels in the IV sensitivity analysis

**Figure S1** Cross-lagged standard regression coefficient of RC and blood pressure levels

**Table S1 Baseline characteristic of 24252 participants in longitudinal analysis**

|                                       | <b>Total<br/>(N=24252)</b> |
|---------------------------------------|----------------------------|
| Age (year, mean (SD))                 | 45.15(11.27)               |
| Gender, male (%)                      | 15371(63.38)               |
| Heart rate (bpm, mean (SD))           | 72.73(10.14)               |
| BMI (kg/m <sup>2</sup> , mean (SD))   | 24.12(3.28)                |
| WC (cm, mean (SD))                    | 83.67(10.31)               |
| SBP (mmHg, mean (SD))                 | 121.37(16.82)              |
| DBP (mmHg, mean (SD))                 | 77.51(11.28)               |
| FBG (mmol/L, mean (SD))               | 5.50(1.19)                 |
| TC (mmol/L, mean (SD))                | 4.90(0.96)                 |
| TG (mmol/L, mean (SD))                | 1.78(1.59)                 |
| LDL-C (mmol/L, mean (SD))             | 2.71(0.73)                 |
| RC (mmol/L, mean (SD))                | 0.81(0.59)                 |
| ALT (IU/L, mean (SD))                 | 27.80(24.12)               |
| AST (IU/L, mean (SD))                 | 26.99(14.90)               |
| γ-GGT (IU/L, mean (SD))               | 36.07(41.01)               |
| Scr (μmol/L, mean (SD))               | 71.50(15.98)               |
| SUA (μmol/L, mean (SD))               | 344.11(90.75)              |
| BUN (mmol/L, mean (SD))               | 5.15(1.31)                 |
| RBC (×10 <sup>12</sup> /L, mean (SD)) | 4.77(0.49)                 |
| LEU (×10 <sup>9</sup> /L, mean (SD))  | 6.02(2.00)                 |
| HGB (g/L, mean (SD))                  | 144.49(14.83)              |
| PLT (×10 <sup>9</sup> /L, mean (SD))  | 199.56(53.94)              |
| HRC (%)                               | 10541(43.46)               |
| Type 2 diabetes (%)                   | 1621(6.70)                 |
| Hypertension (%)                      | 5071(20.91)                |
| Dyslipidemia (%)                      | 9975(41.13)                |
| MetS (%)                              | 8309(34.33)                |

**Abbreviations:** SD, standard deviation; BMI, body mass index; WC, waist circumference; SBP, systolic blood pressure; DBP, diastolic blood pressure; FBG, fasting blood glucose; TC, total cholesterol; TG, triglycerides; LDL-C, low-density lipoprotein cholesterol; RC, remnant cholesterol; ALT, alanine aminotransferase; AST, aspartate transaminase; γ-GGT, γ-glutamyltranspeptidase; Scr, serum creatinine; SUA, serum uric acid; BUN, blood urea nitrogen; RBC, red blood cell; LEU, leukocyte count; HGB, haemoglobin; PLT, platelet count; HRC, high remnant cholesterol; MetS, metabolic syndrome.

**Table S2 Baseline characteristics of study variables in Cohort 1**

|                                            | <b>Total<br/>(N=19181)</b> | <b>NRC<br/>(N=11405)</b> | <b>HRC<br/>(N=7776)</b> | <b><i>P-value</i> *</b> |
|--------------------------------------------|----------------------------|--------------------------|-------------------------|-------------------------|
| <b>Age (year, mean (SD))</b>               | 43.69(10.69)               | 43.56(10.81)             | 43.90(10.52)            | 0.032                   |
| <b>Gender, male (%)</b>                    | 11500(59.96)               | 6164(54.05)              | 5336(68.62)             | <0.001                  |
| <b>Heart rate (bpm, mean (SD))</b>         | 72.32(9.78)                | 73.22(8.94)              | 69.24(11.74)            | <0.001                  |
| <b>BMI (kg/m<sup>2</sup>, mean (SD))</b>   | 23.67(3.15)                | 23.18(3.11)              | 24.38(3.08)             | <0.001                  |
| <b>WC (cm, mean (SD))</b>                  | 82.24(10.06)               | 80.62(10.20)             | 84.30(9.48)             | <0.001                  |
| <b>SBP (mmHg, mean (SD))</b>               | 115.18(11.04)              | 113.96(10.73)            | 116.98(11.24)           | <0.001                  |
| <b>DBP (mmHg, mean (SD))</b>               | 73.60(8.05)                | 73.12(7.77)              | 74.31(8.39)             | <0.001                  |
| <b>FBG (mmol/L, mean (SD))</b>             | 5.40(1.06)                 | 5.30(0.90)               | 5.54(1.25)              | <0.001                  |
| <b>TC (mmol/L, mean (SD))</b>              | 4.83(0.94)                 | 4.51(0.81)               | 5.31(0.91)              | <0.001                  |
| <b>TG (mmol/L, mean (SD))</b>              | 1.65(1.45)                 | 1.20(0.57)               | 2.32(1.99)              | <0.001                  |
| <b>LDL-C (mmol/L, mean (SD))</b>           | 2.68(0.72)                 | 2.66(0.75)               | 2.71(0.67)              | <0.001                  |
| <b>RC (mmol/L, mean (SD))</b>              | 0.77(0.56)                 | 0.42(0.21)               | 1.28(0.53)              | <0.001                  |
| <b>ALT (IU/L, mean (SD))</b>               | 26.37(21.36)               | 23.63(19.81)             | 30.40(22.86)            | <0.001                  |
| <b>AST (IU/L, mean (SD))</b>               | 26.03(12.97)               | 23.94(10.54)             | 28.03(14.66)            | <0.001                  |
| <b>γ-GGT (IU/L, mean (SD))</b>             | 32.94(36.90)               | 27.42(30.18)             | 39.97(42.99)            | <0.001                  |
| <b>Scr (μmol/L, mean (SD))</b>             | 70.55(15.54)               | 68.51(15.32)             | 73.55(15.38)            | <0.001                  |
| <b>SUA (μmol/L, mean (SD))</b>             | 335.46(88.69)              | 315.20(83.34)            | 354.86(89.33)           | <0.001                  |
| <b>BUN (mmol/L, mean (SD))</b>             | 5.09(1.29)                 | 5.01(1.28)               | 5.20(1.30)              | <0.001                  |
| <b>RBC (×10<sup>12</sup>/L, mean (SD))</b> | 4.74(0.49)                 | 4.66(0.48)               | 4.84(0.48)              | <0.001                  |
| <b>LEU (×10<sup>9</sup>/L, mean (SD))</b>  | 5.98(2.10)                 | 5.85(1.51)               | 6.17(2.73)              | <0.001                  |
| <b>HGB (g/L, mean (SD))</b>                | 143.42(14.89)              | 141.50(15.24)            | 146.32(13.85)           | <0.001                  |
| <b>PLT (×10<sup>9</sup>/L, mean (SD))</b>  | 200.74(53.92)              | 204.31(53.77)            | 195.45(53.71)           | <0.001                  |
| <b>HRC (%)</b>                             | 7776(40.54)                | 0(0.00)                  | 7776(100.00)            | <0.001                  |
| <b>Type 2 diabetes (%)</b>                 | 966(5.05)                  | 476(4.18)                | 490(6.33)               | <0.001                  |
| <b>Hypertension (%)</b>                    | 0(0.00)                    | 0(0.00)                  | 0(0.00)                 | -                       |
| <b>Dyslipidemia (%)</b>                    | 7218(37.63)                | 3310(29.02)              | 3908(50.26)             | <0.001                  |
| <b>MetS (%)</b>                            | 4616(24.11)                | 1986(17.45)              | 2630(33.89)             | <0.001                  |

**Abbreviations:** NRC, normal remnant cholesterol; HRC, high remnant cholesterol; SD, standard deviation; BMI, body mass index; WC, waist circumference; SBP, systolic blood pressure; DBP, diastolic blood pressure; FBG, fasting blood glucose; TC, total cholesterol; TG, triglycerides; LDL-C, low-density lipoprotein cholesterol; RC, remnant cholesterol; ALT, alanine aminotransferase; AST, aspartate transaminase; γ-GGT, γ-glutamyltranspeptidase; Scr, serum creatinine; SUA, serum uric acid; BUN, blood urea nitrogen; RBC, red blood cell; LEU, leukocyte count; HGB, haemoglobin; PLT, platelet count; MetS, metabolic syndrome.

\* *P-values* were calculated by student's t-test for normally distributed variables and the Wilcoxon rank-sum test for non-normal distributed variables, as well as the chi-square test or Fisher's exact test for categorical variables.

**Table S3 Baseline characteristics of study variables in Cohort 2**

|                                       | Total<br>(N=13711) | Non-hypertension<br>(N=11405) | Hypertension<br>(N=2306) | <i>P-value</i> * |
|---------------------------------------|--------------------|-------------------------------|--------------------------|------------------|
| Age (year, mean (SD))                 | 44.92(11.42)       | 43.56(10.81)                  | 51.63(11.99)             | <0.001           |
| Gender, male (%)                      | 7816(57.01)        | 6164(54.05)                   | 1652(71.64)              | <0.001           |
| Heart rate (bpm, mean (SD))           | 73.45(9.14)        | 73.22(8.94)                   | 74.56(10.01)             | <0.001           |
| BMI (kg/m <sup>2</sup> , mean (SD))   | 23.55(3.22)        | 23.18(3.11)                   | 25.35(3.18)              | <0.001           |
| WC (cm, mean (SD))                    | 81.83(10.55)       | 80.62(10.20)                  | 87.97(10.12)             | <0.001           |
| SBP (mmHg, mean (SD))                 | 118.74(15.47)      | 113.96(10.73)                 | 142.37(13.47)            | <0.001           |
| DBP (mmHg, mean (SD))                 | 76.17(10.40)       | 73.12(7.77)                   | 91.24(8.48)              | <0.001           |
| FBG (mmol/L, mean (SD))               | 5.37(0.99)         | 5.30(0.90)                    | 5.71(1.31)               | <0.001           |
| TC (mmol/L, mean (SD))                | 4.54(0.82)         | 4.51(0.81)                    | 4.71 (0.86)              | <0.001           |
| TG (mmol/L, mean (SD))                | 1.24(0.59)         | 1.20(0.57)                    | 1.45(0.64)               | <0.001           |
| LDL-C (mmol/L, mean (SD))             | 2.70(0.77)         | 2.66(0.75)                    | 2.90(0.80)               | <0.001           |
| RC (mmol/L, mean (SD))                | 0.42(0.21)         | 0.42(0.21)                    | 0.44 (0.21)              | <0.001           |
| ALT (IU/L, mean (SD))                 | 24.58(21.66)       | 23.63(19.81)                  | 29.27 (28.66)            | <0.001           |
| AST (IU/L, mean (SD))                 | 24.60(12.16)       | 23.94(10.54)                  | 27.80(17.79)             | <0.001           |
| γ-GGT (IU/L, mean (SD))               | 29.23(32.17)       | 27.42(30.18)                  | 37.87(39.20)             | <0.001           |
| Scr (μmol/L, mean (SD))               | 69.27(15.46)       | 68.51(15.32)                  | 72.99(15.59)             | <0.001           |
| SUA (μmol/L, mean (SD))               | 321.90(85.06)      | 315.20(83.34)                 | 354.75(85.78)            | <0.001           |
| BUN (mmol/L, mean (SD))               | 5.07(1.29)         | 5.01(1.28)                    | 5.35(1.32)               | <0.001           |
| RBC (×10 <sup>12</sup> /L, mean (SD)) | 4.69(0.48)         | 4.66(0.48)                    | 4.83(0.47)               | <0.001           |
| LEU (×10 <sup>9</sup> /L, mean (SD))  | 5.88(1.52)         | 5.85(1.51)                    | 6.06(1.55)               | <0.001           |
| HGB (g/L, mean (SD))                  | 142.46(15.24)      | 141.50(15.24)                 | 147.22(14.33)            | <0.001           |
| PLT (×10 <sup>9</sup> /L, mean (SD))  | 203.62(53.89)      | 204.31(53.77)                 | 200.18(54.39)            | 0.001            |
| HRC (%)                               | 0(0.00)            | 0(0.00)                       | 0(0.00)                  | -                |
| Type 2 diabetes (%)                   | 708(5.17)          | 476(4.18)                     | 232(10.07)               | <0.001           |
| Hypertension (%)                      | 2306(16.82)        | 0(0.00)                       | 2306(100.00)             | <0.001           |
| Dyslipidemia (%)                      | 4277(31.19)        | 3310(29.02)                   | 967(41.93)               | <0.001           |
| MetS (%)                              | 3431(25.08)        | 1986(17.45)                   | 1445(62.94)              | <0.001           |

**Abbreviations:** SD, standard deviation; BMI, body mass index; WC, waist circumference; SBP, systolic blood pressure; DBP, diastolic blood pressure; FBG, fasting blood glucose; TC, total cholesterol; TG, triglycerides; LDL-C, low-density lipoprotein cholesterol; RC, remnant cholesterol; ALT, alanine aminotransferase; AST, aspartate transaminase; γ-GGT, γ-glutamyltranspeptidase; Scr, serum creatinine; SUA, serum uric acid; BUN, blood urea nitrogen; RBC, red blood cell; LEU, leukocyte count; HGB, haemoglobin; PLT, platelet count; HRC, high remnant cholesterol; MetS, metabolic syndrome.

\* *P-values* were calculated by student's t-test for normally distributed variables and the Wilcoxon rank-sum test for non-normal distributed variables, as well as the chi-square test or Fisher's exact test for categorical variables.

**Table S4 Baseline hypertension was associated with subsequent HRC in Cohort 2**

|                                          | Non-hypertension | hypertension    |         |
|------------------------------------------|------------------|-----------------|---------|
| Incident cases of HRC, n (%)             | 4341(38.06)      | 1030(44.67)     |         |
| Incident rate<br>(per 1000 person-years) | 90.30            | 106.22          |         |
| Model                                    | HR(95% CI)       | HR(95% CI)      | P-value |
| Crude                                    | ref              | 1.20(1.12,1.29) | <0.001  |
| Model 1*                                 | ref              | 1.23(1.15,1.32) | <0.001  |
| Model 2†                                 | ref              | 1.25(1.17,1.35) | <0.001  |

**Abbreviations:** HRC, high remnant cholesterol; HR, hazard ratio; CI, confidence interval.

\* In Model 1, the adjustment factors included age, sex and heart rate.

† In Model 2, the adjustment factors included age, sex, heart rate, body mass index, fasting blood glucose, alanine aminotransferase, leukocyte count, and serum creatinine.

**Table S5 Cross-lagged standard regression coefficient of RC and blood pressure levels in the IV sensitivity analysis**

| <b>Variables</b> | <b><math>\beta_{RC\text{-blood pressure}}</math>(95% CI)</b> | <b><math>\beta_{blood\ pressure\text{-RC}}</math>(95% CI)</b> | <b><i>P-value</i></b> <sup>*</sup> | <b>CFI</b> |
|------------------|--------------------------------------------------------------|---------------------------------------------------------------|------------------------------------|------------|
| Hypertension     | 0.025(0.013,0.037)                                           | 0.007(-0.005,0.019)                                           | <0.001                             | 0.944      |
| SBP              | 0.031(0.019,0.043)                                           | 0.011(-0.001,0.023)                                           | <0.001                             | 0.933      |
| DBP              | 0.068(0.056,0.079)                                           | 0.024(0.012,0.036)                                            | <0.001                             | 0.935      |
| MAP              | 0.055(0.044,0.067)                                           | 0.020(0.008,0.032)                                            | <0.001                             | 0.930      |

**Abbreviations:** RC, remnant cholesterol; SBP, systolic blood pressure; DBP, diastolic blood pressure; MAP, mean arterial pressure; CI, confidence interval; CFI, comparative fit index.

\* Test the difference of the cross-lagged path coefficients between  $\beta_{RC\text{-blood pressure}}$  and  $\beta_{blood\ pressure\text{-RC}}$  by the t-test.

The adjustment factors included age, sex, heart rate, body mass index, fasting blood glucose, alanine aminotransferase, leukocyte count, serum creatinine, waist circumference, coronary heart diseases, stroke, and fatty liver disease.

**Figure S1**

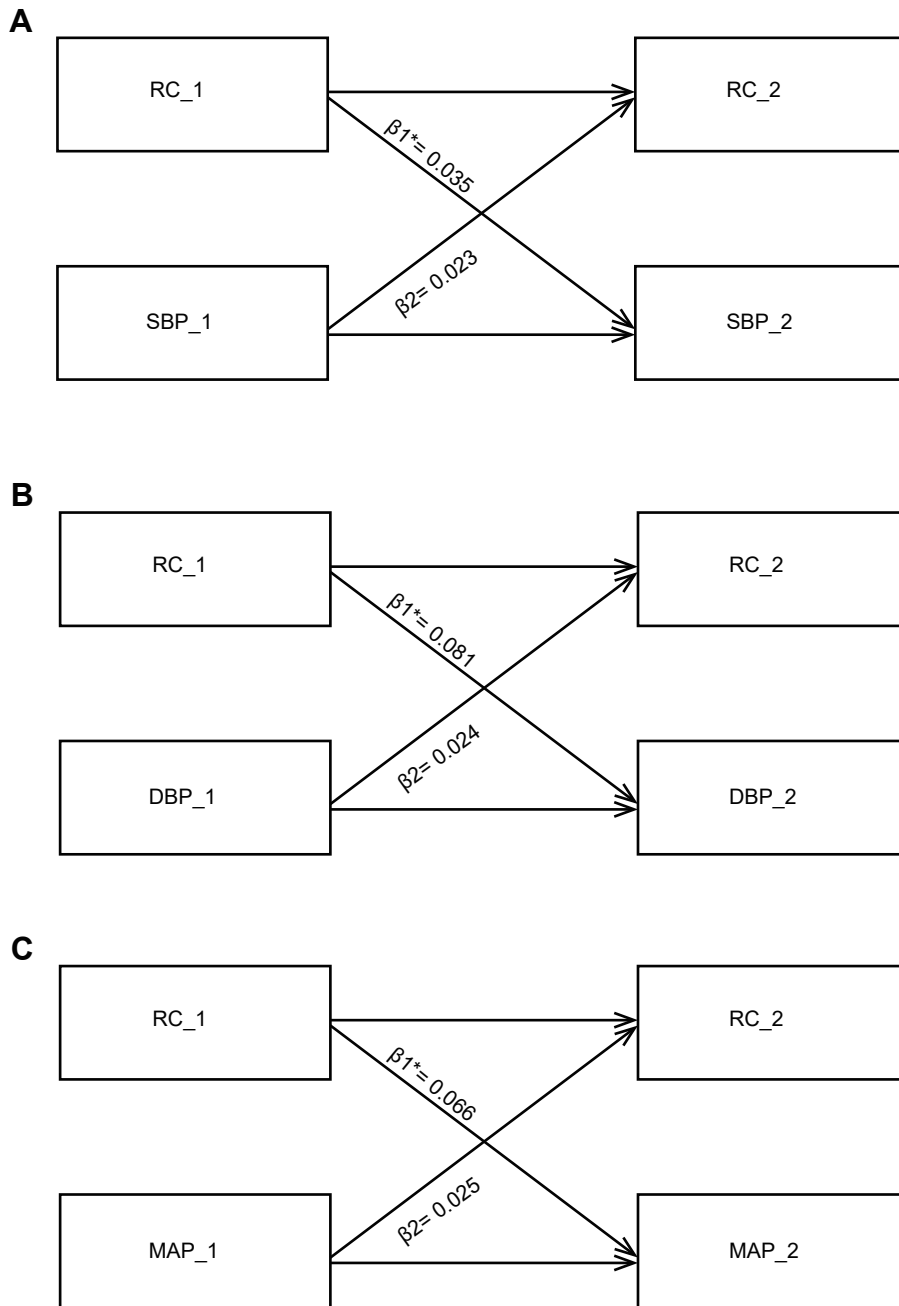

**Figure S1 Cross-lagged standard regression coefficient of RC and blood pressure levels in the sensitivity analysis I.** A, SBP; B, DBP; C, MAP The cross-lagged model was adjusted for age, sex, heart rate, body mass index, fasting blood glucose, alanine aminotransferase, leukocyte count, and serum creatinine. Abbreviations: RC, remnant cholesterol; SBP, systolic blood pressure; DBP, diastolic blood pressure; MAP, mean arterial pressure. \* indicates  $P < 0.001$  when comparing  $\beta_1$  vs.  $\beta_2$ .
